# Supplementary material
Source: PubMed Central journal article supplement (PMC3143047)

## SUPPLEMENTARY DATA

FIG. S1. Relationship between up-/down-regulated genes in the *rad* mutant and aerobic-/anaerobic-expressed genes.  $\text{Log}_{2.5}$  values were calculated from our data (*rad* mutant/WT) and Narsai *et al.* (anaerobic/aerobic; 2009, *Plant Physiology* **151**: 306–322). All the selected genes in our microarray are plotted in the graph.

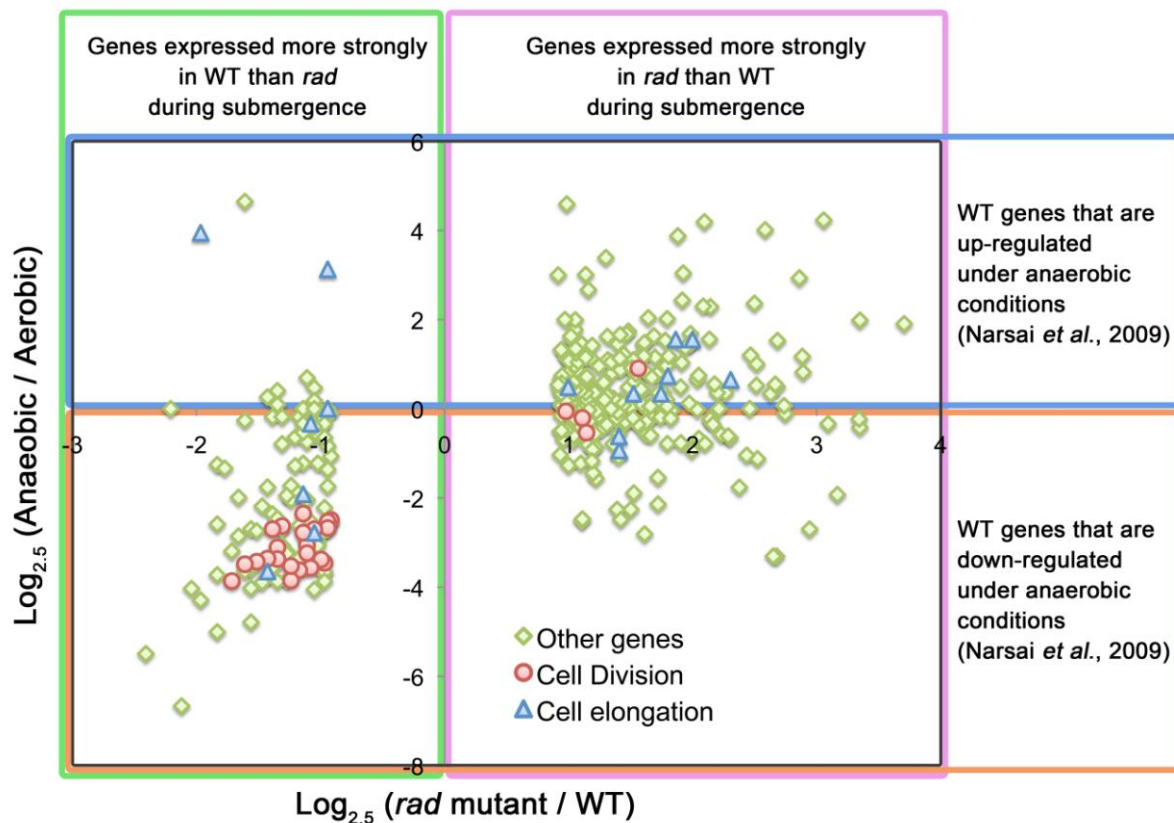

Supplement: supp_mcr137_mcr134supp_fig1.pdf [file supp_mcr137_mcr134supp_fig1.pdf]
