# Supplementary material
Source: PubMed Central journal article supplement (PMC3143047)
Supplement: supp_mcr137_mcr134supp_table1.pdf [file supp_mcr137_mcr134supp_table1.pdf]

## SUPPLEMENTARY DATA

TABLE S1. Up-regulated genes in the *rad* mutant

| Fold change<br>( <i>rad</i> /WT) <sup>a</sup> | Locus ID <sup>b</sup> | Full-length cDNA<br>accession no. <sup>c</sup> | Description <sup>d</sup>                                                                                    | Predicted functional<br>classification | Data in Narsai <i>et al.</i> (2009) <sup>e</sup> |                                            |
|-----------------------------------------------|-----------------------|------------------------------------------------|-------------------------------------------------------------------------------------------------------------|----------------------------------------|--------------------------------------------------|--------------------------------------------|
|                                               |                       |                                                |                                                                                                             |                                        | Fold change                                      | Direction of<br>regulation (24A<br>vs 24N) |
| 40.67                                         | Os01g0944100          | AK103482                                       | Conserved hypothetical protein.                                                                             | unknown                                | 6.72                                             | up                                         |
| 28.47                                         | Os03g0762500          | AK103002                                       | Conserved hypothetical protein.                                                                             | unknown                                | 7.28                                             | up                                         |
| 28.44                                         | Os04g0206600          | AK106302                                       | UDP-glucuronosyl/UDP-glucosyltransferase<br>family protein.                                                 | metabolism                             | 1.52                                             | down                                       |
| 28.29                                         | Os07g0605800          | AK105239                                       | Similar to STF-1 (Fragment).                                                                                | metabolism                             | 1.26                                             | down                                       |
| 25.22                                         | Os03g0133000          | AK107090                                       | Similar to NAC-domain protein 14.                                                                           | transcription                          | No Hit                                           | No Hit                                     |
| 23.74                                         | Os12g0555500          | AK071613                                       | Probenazole-inducible protein PBZ1.                                                                         | stress                                 | 6.86                                             | down                                       |
| 22.03                                         | Os01g0172100          | AK060343                                       | Similar to Triose phosphate/phosphate<br>translocator, non-green plastid, chloroplast<br>precursor (CTPT).  | membrane protein                       | 1.40                                             | down (p<0.01)                              |
| 21.27                                         | Os01g0837200          | AK062368                                       | Conserved hypothetical protein.                                                                             | unknown                                | 68.76                                            | up (p<0.01)                                |
| 18.98                                         | Os05g0438500          | AK059951                                       | Similar to Soluble inorganic pyrophosphatase<br>(EC 3.6.1.1) (Pyrophosphate phospho-<br>hydrolase) (PPase). | metabolism                             | 14.89                                            | down (p<0.01)                              |
| 18.01                                         | Os08g0502700          | AK064774                                       | Pyridoxal phosphate-dependent transferase,<br>major region, subdomain 1 domain containing<br>protein.       | metabolism                             | 2.27                                             | up                                         |
| 17.90                                         | Os05g0324700          | AK063581                                       | Conserved hypothetical protein.                                                                             | unknown                                | 3.23                                             | up                                         |

|       |              |          |                                                                        |                    |        |               |
|-------|--------------|----------|------------------------------------------------------------------------|--------------------|--------|---------------|
| 17.48 | Os08g0502600 | AK107730 | Calcium-binding EF-hand domain containing protein.                     | ion binding        | 18.78  | up (p<0.01)   |
| 15.86 | Os03g0129100 | AK098993 | Seven transmembrane protein MLO2.                                      | membrane protein   | No Hit | No Hit        |
| 15.60 | Os01g0627900 | AK063764 | Similar to Cytochrome P450 monooxygenase CYP72A5 (Fragment).           | catalytic activity | 1.12   | down          |
| 15.45 | Os07g0457800 | AK102686 | Conserved hypothetical protein.                                        | unknown            | 1.07   | up            |
| 14.93 | Os06g0586000 | AK063903 | Conserved hypothetical protein.                                        | unknown            | No Hit | No Hit        |
| 14.82 | Os03g0437200 | AK059839 | Zinc finger, C2H2-type domain containing protein.                      | ion binding        | No Hit | No Hit        |
| 14.65 | Os03g0218400 | AK069202 | Similar to Hexose transporter. (OsMST4)                                | membrane protein   | 4.61   | up (p<0.01)   |
| 14.59 | Os05g0571200 | AK108389 | Similar to WRKY transcription factor 19.                               | transcription      | 1.64   | up (p<0.01)   |
| 14.53 | Os10g0530900 | AK103699 | Similar to Glutathione S-transferase GST 30 (EC 2.5.1.18).             | stress             | 27.31  | down (p<0.01) |
| 14.39 | Os01g0864500 | AK068115 | Harpin-induced 1 domain containing protein.                            | unknown            | 1.73   | up            |
| 14.17 | Os10g0530900 | AK059760 | Similar to Glutathione S-transferase GST 30 (EC 2.5.1.18).             | stress             | 27.31  | down (p<0.01) |
| 13.87 | Os09g0535500 | AK108282 | Similar to RING-H2 finger protein ATL1R (RING-H2 finger protein ATL8). | protein binding    | 1.40   | up            |
| 13.27 | Os07g0604300 | AK101860 | Similar to Phytochelatin synthetase (Fragment).                        | detoxication       | 55.35  | up (p<0.01)   |
| 12.47 | Os04g0615200 | AK063824 | Conserved hypothetical protein.                                        | unknown            | 3.07   | down          |
| 12.39 | Os01g0958200 | AK107370 | Curculin-like (mannose-binding) lectin domain containing protein.      | signaling          | 2.73   | up (p<0.01)   |

|       |              |          |                                                                           |                    |        |               |
|-------|--------------|----------|---------------------------------------------------------------------------|--------------------|--------|---------------|
| 12.36 | Os03g0737300 | AK071016 | HAD-superfamily phosphatase, subfamily IIC domain containing protein.     | catalytic activity | 1.69   | up            |
| 12.17 | Os11g0702200 | AK101155 | Glycoside hydrolase, family 18 protein.                                   | metabolism         | 10.63  | up (p<0.01)   |
| 11.79 | Os01g0783700 | AK109278 | Similar to EF-hand Ca <sup>2+</sup> -binding protein CCD1.                | ion binding        | 3.32   | up            |
| 11.71 | Os02g0300700 | AK069347 | Similar to Eukaryotic translation initiation factor 1A (EIF-1A) (EIF-4C). | translation        | 1.00   | up            |
| 11.43 | Os03g0322200 | AK062978 | Conserved hypothetical protein.                                           | unknown            | 2.84   | down          |
| 10.77 | Os06g0726200 | AK061042 | Endochitinase precursor (EC 3.2.1.14).                                    | catalytic activity | 5.82   | down (p<0.01) |
| 10.05 | Os02g0275200 | AK071664 | Xyloglucan fucosyltransferase family protein.                             | cell elongation    | 1.91   | up            |
| 9.98  | Os04g0497000 | AK109382 | Similar to Allyl alcohol dehydrogenase.                                   | metabolism         | 1.92   | down          |
| 9.84  | Os05g0506000 | AK062012 | Similar to MS5-like protein (Fragment).                                   | unknown            | 1.84   | down          |
| 9.74  | Os03g0710000 | AK060065 | Protein of unknown function DUF292, eukaryotic domain containing protein. | unknown            | No Hit | No Hit        |
| 9.63  | Os09g0502500 | AK109664 | Alcohol dehydrogenase superfamily, zinc-containing protein.               | metabolism         | 1.43   | up            |
| 9.31  | Os10g0497700 | AK071225 | Similar to Phytochelatin synthetase.                                      | detoxication       | 1.78   | down          |
| 9.14  | Os01g0661800 | AK103579 | Conserved hypothetical protein.                                           | unknown            | 1.00   | down          |
| 9.02  | Os09g0511600 | AK105396 | Glycoside hydrolase, family 1 protein.                                    | metabolism         | 1.43   | up            |
| 8.82  | Os01g0826400 | AK107199 | WRKY transcription factor 24 (WRKY24).                                    | transcription      | 1.74   | up            |
| 8.71  | Os01g0793900 | AK062811 | Conserved hypothetical protein.                                           | unknown            | 1.42   | down          |
| 8.53  | Os01g0687400 | AK106178 | Similar to Chitinase (EC 3.2.1.14).                                       | catalytic activity | 1.30   | down          |
| 8.53  | Os02g0808800 | AK064401 | Similar to Cinnamoyl-CoA reductase (EC                                    | metabolism         | 9.84   | up            |

1.2.1.44).

|      |              |          |                                                                 |                    |        |             |
|------|--------------|----------|-----------------------------------------------------------------|--------------------|--------|-------------|
| 8.52 | Os05g0421600 | AK107746 | No apical meristem (NAM) protein domain containing protein.     | transcription      | 1.26   | down        |
| 8.46 | Os08g0540900 | AK111094 | Conserved hypothetical protein.                                 | unknown            | 4.75   | up (p<0.01) |
| 8.17 | Os09g0367700 | AK103316 | Similar to GST6 protein (EC 2.5.1.18).                          | metabolism         | 2.19   | down        |
| 8.13 | Os11g0701000 | AK103295 | Class III chitinase homologue (OsChib3H-c).                     | catalytic activity | 66.26  | up (p<0.01) |
| 8.05 | Os08g0136700 | AK073888 | Protein of unknown function DUF26 domain containing protein.    | unknown            | 9.97   | up (p<0.01) |
| 7.77 | Os10g0444700 | AK101170 | Similar to Phosphate transporter 6.                             | membrane protein   | 1.95   | down        |
| 7.76 | Os01g0816100 | AK073848 | Similar to NAC domain protein.                                  | transcription      | 2.11   | up          |
| 7.70 | Os07g0468200 | AK103051 | Conserved hypothetical protein.                                 | unknown            | No Hit | No Hit      |
| 7.68 | Os07g0192000 | AK065505 | AAA ATPase domain containing protein.                           | ATP binding        | 1.93   | up          |
| 7.68 | Os10g0113000 | AK109414 | Similar to Chalcone reductase homologue (Fragment).             | metabolism         | 1.02   | down        |
| 7.38 | Os05g0542800 | AK106049 | Pectin lyase fold/virulence factor domain containing protein.   | cell elongation    | 4.72   | up (p<0.01) |
| 7.34 | Os07g0244200 | AK109746 | Transferase family protein.                                     | catalytic activity | 2.54   | down        |
| 7.28 | Os04g0678400 | AK107524 | Zinc finger, Dof-type family protein.                           | transcription      | 4.48   | up          |
| 7.26 | Os09g0482800 | AK063923 | EF hand domain containing protein.                              | ion binding        | 5.39   | up (p<0.01) |
| 7.25 | Os01g0720400 | AK061237 | HAD-superfamily subfamily IB hydrolase, hypothetical 1 protein. | catalytic activity | 4.23   | up          |
| 7.19 | Os02g0758200 | AK111266 | Conserved hypothetical protein.                                 | unknown            | 1.13   | up          |
| 6.97 | Os04g0547600 | AK109141 | Pathogenesis-related transcriptional factor and                 | transcription      | 3.92   | up          |

|      |              |          |                                                                                                                                                                                                                                                   |                    |        |               |
|------|--------------|----------|---------------------------------------------------------------------------------------------------------------------------------------------------------------------------------------------------------------------------------------------------|--------------------|--------|---------------|
|      |              |          | ERF domain containing protein.                                                                                                                                                                                                                    |                    |        |               |
| 6.85 | Os02g0211100 | AK063336 | Conserved hypothetical protein.                                                                                                                                                                                                                   | unknown            | 20.96  | up (p<0.01)   |
| 6.80 | Os11g0701400 | AK106319 | Chitinase (EC 3.2.1.14) III C10150-rice (EC 3.2.1.14).                                                                                                                                                                                            | catalytic activity | 11.41  | up (p<0.01)   |
| 6.77 | Os01g0714600 | AK059855 | Conserved hypothetical protein.                                                                                                                                                                                                                   | unknown            | 2.81   | up            |
| 6.72 | Os07g0150700 | AK069726 | Similar to Serine/threonine kinase.                                                                                                                                                                                                               | phosphorylation    | 2.15   | down (p<0.01) |
| 6.71 | Os01g0186900 | AK105331 | Conserved hypothetical protein.                                                                                                                                                                                                                   | unknown            | 1.63   | up            |
| 6.56 | Os11g0701800 | AK063939 | Chitinase (EC 3.2.1.14) III C10701-rice (EC 3.2.1.14) (Class III chitinase homologue (OsChib3H-a)H-).                                                                                                                                             | catalytic activity | 48.30  | up (p<0.01)   |
| 6.45 | Os05g0542800 | AK105858 | Similar to polygalacturonase.                                                                                                                                                                                                                     | cell elongation    | 4.72   | up (p<0.01)   |
| 6.43 | Os02g0208400 | AK073104 | Conserved hypothetical protein.                                                                                                                                                                                                                   | unknown            | No Hit | No Hit        |
| 6.24 | Os10g0345100 | AK069792 | Multi antimicrobial extrusion protein MatE family protein.                                                                                                                                                                                        | membrane protein   | 1.04   | down          |
| 6.19 | Os01g0510200 | AK062310 | Conserved hypothetical protein.                                                                                                                                                                                                                   | unknown            | 1.24   | down          |
| 6.09 | Os02g0202200 | AK107245 | SPX, N-terminal domain containing protein.                                                                                                                                                                                                        | stress             | 3.25   | up            |
| 6.05 | Os04g0604300 | AK070734 | Similar to Xyloglucan endotransglucosylase/hydrolase protein 24 precursor (EC 2.4.1.207) (At-XTH24) (XTH-24) (Meristem protein 5) (MERI-5 protein) (MERI5 protein) (Endo-xyloglucan transferase) (Xyloglucan endo-1,4-beta-D-glucanase) (OsXTH6). | cell elongation    | 2.08   | up            |

|      |              |          |                                                                                       |                     |        |               |
|------|--------------|----------|---------------------------------------------------------------------------------------|---------------------|--------|---------------|
| 6.03 | Os06g0651000 | AK065812 | Similar to NADPH HC toxin reductase (Fragment).                                       | detoxication        | 2.19   | down          |
| 6.02 | Os09g0482840 | AK064644 | EF hand domain containing protein.                                                    | ion binding         | 7.53   | up            |
| 6.02 | Os06g0200700 | AK106950 | Conserved hypothetical protein.                                                       | unknown             | 1.06   | up            |
| 6.00 | Os08g0540400 | AK103306 | Similar to Calcium-dependent protein kinase.                                          | phosphorylation     | No Hit | No Hit        |
| 5.99 | Os07g0471300 | AK069685 | Similar to Argonaute 4 protein.                                                       | transcription       | 1.23   | up            |
| 5.98 | Os11g0702100 | AK102505 | Similar to Class III chitinase homologue (OsChib3H-h) (Fragment).                     | catalytic activity  | 2.62   | up            |
| 5.93 | Os02g0682300 | AK107937 | Zinc finger, RING-type domain containing protein.                                     | protein binding     | 4.63   | up            |
| 5.84 | Os09g0511600 | AK102869 | Glycoside hydrolase, family 1 protein.                                                | metabolism          | 1.43   | up            |
| 5.73 | Os10g0450900 | AK064310 | Similar to Glycine-rich cell wall structural protein 2 precursor (Osgrp-2).           | cell elongation     | 1.40   | up            |
| 5.73 | Os11g0665600 | AK110901 | Helix-turn-helix, Fis-type domain containing protein.                                 | transcription       | 1.13   | up            |
| 5.71 | Os02g0644000 | AK101360 | Similar to C13 endopeptidase NP1 (Fragment).                                          | protein degradation | 1.21   | down          |
| 5.60 | Os04g0450900 | AK067842 | Protein kinase PKN/PRK1, effector domain containing protein.                          | phosphorylation     | 1.43   | up            |
| 5.59 | Os01g0369700 | AK063796 | Similar to Glutathione S-transferase GST 8 (EC 2.5.1.18).                             | stress              | 4.68   | down          |
| 5.59 | Os08g0557600 | AK102459 | Similar to Monodehydroascorbate reductase (EC 1.6.5.4) (MDAR) (Ascorbate free radical | detoxication        | 8.50   | down (p<0.01) |

reductase) (AFR reductase).

|      |              |          |                                                                           |                    |        |             |
|------|--------------|----------|---------------------------------------------------------------------------|--------------------|--------|-------------|
| 5.59 | Os01g0716500 | AK101454 | Methyltransferase type 12 domain containing protein.                      | metabolism         | 1.10   | up          |
| 5.55 | Os02g0209400 | AK108109 | Conserved hypothetical protein.                                           | unknown            | 2.17   | up          |
| 5.46 | Os03g0230300 | AK058934 | Poly(ADP-ribose) polymerase, catalytic region domain containing protein.  | DNA repair         | 3.17   | up (p<0.01) |
| 5.43 | Os01g0584900 | AK108522 | WRKY transcription factor 28-like (WRKY5) (WRKY transcription factor 77). | transcription      | No Hit | No Hit      |
| 5.41 | Os06g0220500 | AK063324 | UDP-glucuronosyl/UDP-glucosyltransferase family protein.                  | metabolism         | 5.13   | up (p<0.01) |
| 5.32 | Os12g0635400 | AK063156 | VQ domain containing protein.                                             | unknown            | 2.01   | up          |
| 5.31 | Os10g0568900 | AK103251 | Haloacid dehalogenase-like hydrolase domain containing protein.           | catalytic activity | 1.23   | down        |
| 5.27 | Os03g0608000 | AK111073 | Conserved hypothetical protein.                                           | unknown            | 1.82   | down        |
| 5.26 | Os04g0231800 | AK068417 | Conserved hypothetical protein.                                           | unknown            | 1.06   | up          |
| 5.23 | Os12g0517200 | AK111513 | Mitochondrial ribosomal protein S10.                                      | translation        | 1.05   | up          |
| 5.17 | Os03g0153900 | AK106420 | Aromatic-ring hydroxylase family protein.                                 | metabolism         | 7.69   | up (p<0.01) |
| 5.11 | Os10g0113000 | AK059636 | Similar to Chalcone reductase homologue (Fragment).                       | metabolism         | 1.02   | down        |
| 5.09 | Os10g0528400 | AK061304 | Glutathione S-transferase, N-terminal domain containing protein.          | stress             | 1.78   | down        |
| 5.08 | Os02g0532500 | AK059817 | Germin family protein.                                                    | unknown            | 1.34   | down        |

|      |              |          |                                                                                |                    |        |             |
|------|--------------|----------|--------------------------------------------------------------------------------|--------------------|--------|-------------|
| 5.07 | Os05g0198400 | AK071272 | Similar to Zinc transporter 4, chloroplast precursor (ZRT/IRT-like protein 4). | membrane protein   | 2.29   | up          |
| 5.02 | Os12g0555200 | AK099157 | Similar to Probenazole-inducible protein PBZ1.                                 | stress             | 16.62  | down        |
| 5.01 | Os09g0483400 | AK103890 | Ubiquitin.                                                                     | others             | 4.40   | up (p<0.01) |
| 4.99 | Os08g0336200 | AK111135 | Conserved hypothetical protein.                                                | unknown            | 3.26   | up (p<0.01) |
| 4.98 | Os11g0701100 | AK064356 | Similar to Class III chitinase homologue (OsChib3H-h) (Fragment).              | catalytic activity | 4.24   | up (p<0.01) |
| 4.94 | Os05g0522600 | AK100082 | Leucine-rich repeat, plant specific containing protein.                        | nucleotide binding | 1.51   | up          |
| 4.93 | Os03g0388500 | AK070350 | Similar to Anther ethylene-upregulated protein ER1 (Fragment).                 | signaling          | 1.09   | up          |
| 4.88 | Os02g0173200 | AK068418 | VQ domain containing protein.                                                  | unknown            | 1.55   | up          |
| 4.87 | Os03g0281500 | AK100137 | Similar to Resistance protein candidate (Fragment).                            | unknown            | No Hit | No Hit      |
| 4.86 | Os03g0776900 | AK107941 | Similar to DNAJ protein-like.                                                  | others             | 1.44   | down        |
| 4.82 | Os10g0521100 | AK064063 | Similar to Actin-depolymerizing factor 6 (ADF-6) (AtADF6).                     | actin binding      | 2.91   | up          |
| 4.77 | Os03g0107700 | AK063743 | Similar to EL2 protein.                                                        | cell division      | 2.47   | up          |
| 4.76 | Os03g0230300 | AK102303 | Poly(ADP-ribose) polymerase, catalytic region domain containing protein.       | DNA repair         | 3.17   | up (p<0.01) |
| 4.75 | Os07g0516300 | AK102726 | Protein of unknown function DUF584 family protein.                             | unknown            | 1.42   | down        |
| 4.75 | Os01g0952900 | AK104991 | Conserved hypothetical protein.                                                | unknown            | No Hit | No Hit      |



|      |              |          |                                                                             |                    |        |               |
|------|--------------|----------|-----------------------------------------------------------------------------|--------------------|--------|---------------|
| 4.71 | Os03g0702000 | AK105398 | UDP-glucuronosyl/UDP-glucosyltransferase family protein.                    | metabolism         | No Hit | No Hit        |
| 4.68 | Os01g0740700 | AK109635 | Conserved hypothetical protein.                                             | unknown            | 2.19   | up            |
| 4.68 | Os01g0135700 | AK062711 | EF-HAND 2 domain containing protein.                                        | ion binding        | 1.26   | up            |
| 4.67 | Os05g0503300 | AK073969 | Similar to Sulfite reductase (Fragment).                                    | metabolism         | 1.40   | up            |
| 4.66 | Os11g0141400 | AK070778 | Similar to Calmodulin-like protein CaML3.                                   | ion binding        | No Hit | No Hit        |
| 4.60 | Os04g0401700 | AK100669 | Potassium transporter 1 (OsHAK1). Splice isoform 2.                         | membrane protein   | 6.62   | down (p<0.01) |
| 4.60 | Os02g0181300 | AK058773 | Similar to WRKY transcription factor.                                       | transcription      | 1.85   | up            |
| 4.59 | Os09g0480600 | AK107853 | Conserved hypothetical protein.                                             | unknown            | 2.99   | up (p<0.01)   |
| 4.59 | Os10g0450900 | AK064065 | Similar to Glycine-rich cell wall structural protein 2 precursor (Osgrp-2). | cell elongation    | 1.40   | up            |
| 4.57 | Os10g0491000 | AK100816 | Plant Basic Secretory Protein family protein.                               | unknown            | 1.23   | down          |
| 4.52 | Os02g0756800 | AK063605 | Phosphate-induced protein 1 conserved region family protein.                | unknown            | 2.50   | up (p<0.01)   |
| 4.49 | Os12g0268000 | AK071599 | Similar to Cytochrome P450 71A1 (EC 1.14.-.-) (CYPLXXIA1) (ARP-2).          | metabolism         | 9.58   | down (p<0.01) |
| 4.47 | Os02g0590800 | AK060204 | Similar to Serine/threonine-protein kinase Nek6.                            | phosphorylation    | 1.04   | up            |
| 4.40 | Os03g0305100 | AK101765 | Similar to AMP-binding protein.                                             | catalytic activity | 1.62   | up            |
| 4.40 | Os02g0327000 | AK073631 | C2 domain containing protein.                                               | ion binding        | 5.69   | up (p<0.01)   |
| 4.34 | Os01g0498300 | AK069247 | Glycosyltransferase AER61                                                   | metabolism         | 5.35   | up (p<0.01)   |
| 4.30 | Os03g0141200 | AK068968 | Similar to Beta-amylase PCT-BMYI (EC 3.2.1.2).                              | metabolism         | 1.34   | down          |

|      |              |          |                                                                                                                                                            |                     |       |               |
|------|--------------|----------|------------------------------------------------------------------------------------------------------------------------------------------------------------|---------------------|-------|---------------|
| 4.24 | Os05g0194900 | AK071798 | Similar to<br>Pyrophosphate-fructose-6-phosphate<br>1-phosphotransferase-like protein<br>(Pyrophosphate-dependent<br>phosphofructo-1-kinase-like protein). | metabolism          | 3.38  | up (p<0.01)   |
| 4.23 | Os03g0724600 | AK063718 | Conserved hypothetical protein.                                                                                                                            | unknown             | 1.09  | up            |
| 4.20 | Os03g0743900 | AK099593 | Similar to ATP sulfurylase.                                                                                                                                | metabolism          | 1.48  | down (p<0.01) |
| 4.18 | Os04g0518400 | AK067801 | Similar to Phenylalanine ammonia-lyase<br>(Fragment).                                                                                                      | metabolism          | 2.56  | up            |
| 4.14 | Os02g0755900 | AK104985 | Similar to Glucosyltransferase (Fragment).                                                                                                                 | metabolism          | 12.01 | down (p<0.01) |
| 4.13 | Os05g0402900 | AK070554 | Similar to EDGP.                                                                                                                                           | protein degradation | 2.39  | up (p<0.01)   |
| 4.13 | Os02g0188400 | AK111118 | Conserved hypothetical protein.                                                                                                                            | unknown             | 1.19  | up            |
| 4.12 | Os11g0701900 | AK064281 | Glycoside hydrolase, family 18 protein.                                                                                                                    | metabolism          | 5.26  | up (p<0.01)   |
| 4.11 | Os01g0948600 | AK103603 | Conserved hypothetical protein.                                                                                                                            | unknown             | 3.10  | up            |
| 4.09 | Os03g0133400 | AK073032 | Peptidoglycan-binding LysM domain<br>containing protein.                                                                                                   | cell elongation     | 2.55  | down (p<0.01) |
| 4.08 | Os06g0621900 | AK101940 | Similar to Alpha-expansin OsEXPA16<br>(Fragment).                                                                                                          | cell elongation     | 1.86  | down          |
| 4.07 | Os04g0450000 | AK108406 | Zinc finger, FYVE/PHD-type domain<br>containing protein.                                                                                                   | protein binding     | 1.75  | down          |
| 4.07 | Os10g0527800 | AK063773 | Similar to Tau class GST protein 3.                                                                                                                        | stress              | 2.95  | down (p<0.01) |
| 4.04 | Os01g0955100 | AK062671 | Similar to Avr9/Cf-9 rapidly elicited protein<br>57 (Fragment).                                                                                            | ion binding         | 4.27  | up            |
| 4.03 | Os01g0383700 | AK070583 | Conserved hypothetical protein.                                                                                                                            | unknown             | 1.08  | down          |

|      |              |          |                                                                                                        |                  |      |               |
|------|--------------|----------|--------------------------------------------------------------------------------------------------------|------------------|------|---------------|
| 4.02 | Os04g0565200 | AK111866 | Similar to Cis-zeatin O-glucosyltransferase 1 (EC 2.4.1.215) (cisZOG1).                                | hormone          | 9.58 | down (p<0.01) |
| 4.00 | Os01g0850900 | AK102887 | SOUL heme-binding protein family protein.                                                              | metabolism       | 1.24 | down          |
| 3.99 | Os04g0209200 | AK100406 | Similar to Glutathione-conjugate transporter AtMRP4.                                                   | membrane protein | 1.03 | down          |
| 3.93 | Os05g0414700 | AK111590 | Serine/threonine protein kinase domain containing protein.                                             | phosphorylation  | 1.03 | up            |
| 3.91 | Os02g0465900 | AK071205 | ChaC-like protein family protein.                                                                      | unknown          | 1.26 | up            |
| 3.89 | Os09g0385700 | AK065210 | Zinc finger, AN1-type domain containing protein.                                                       | ion binding      | 2.20 | down          |
| 3.87 | Os03g0773300 | AK100394 | Protein kinase, core domain containing protein.                                                        | phosphorylation  | 2.23 | up            |
| 3.86 | Os04g0398000 | AK101501 | Pathogenesis-related transcriptional factor and ERF domain containing protein.                         | transcription    | 1.09 | up            |
| 3.84 | Os06g0649000 | AK106282 | Similar to WRKY transcription factor 28.                                                               | transcription    | 2.85 | up            |
| 3.83 | Os01g0391100 | AK108533 | Similar to ATP-binding cassette, sub-family F, member 2 (Iron inhibited ABC transporter 2) (HUSSY-18). | unknown          | 1.00 | down          |
| 3.83 | Os03g0758000 | AK069091 | Similar to WRKY DNA binding protein.                                                                   | transcription    | 1.13 | up            |
| 3.73 | Os05g0534400 | AK101368 | Similar to Calcineurin B-like protein 4 (SALT OVERLY SENSITIVE 3 protein).                             | ion binding      | 3.00 | up (p<0.01)   |
| 3.73 | Os07g0625400 | AK073278 | BTB/POZ fold domain containing protein.                                                                | protein binding  | 1.10 | up            |

|      |              |          |                                                                                                                                          |                     |        |             |
|------|--------------|----------|------------------------------------------------------------------------------------------------------------------------------------------|---------------------|--------|-------------|
| 3.72 | Os06g0506600 | AK066232 | Similar to Ubiquitin-conjugating enzyme E2-17 kDa 8 (EC 6.3.2.19) (Ubiquitin- protein ligase 8) (Ubiquitin carrier protein 8) (UBCAT4A). | protein degradation | 1.37   | up          |
| 3.72 | Os03g0602300 | AK101670 | Cytochrome P450 85A1 (EC 1.14.-.-) (C6-oxidase) (OsDWARF) (Dwarf protein).                                                               | hormone             | 5.06   | up (p<0.01) |
| 3.71 | Os03g0822400 | AK070075 | Conserved hypothetical protein.                                                                                                          | unknown             | 1.33   | up          |
| 3.70 | Os06g0683400 | AK111852 | Similar to EF-hand Ca <sup>2+</sup> -binding protein CCD1.                                                                               | ion binding         | 1.43   | down        |
| 3.67 | Os05g0187100 | AK067988 | Similar to Hexokinase.                                                                                                                   | metabolism          | 29.64  | up (p<0.01) |
| 3.63 | Os05g0339200 | AK111022 | Conserved hypothetical protein.                                                                                                          | unknown             | 1.22   | up          |
| 3.61 | Os01g0280500 | AK103139 | Similar to Eukaryotic translation initiation factor 6 (eIF-6) (B4 integrin interactor) (CAB) (p27(BBP)) (B(2)GCN homolog).               | translation         | 1.80   | up          |
| 3.61 | Os05g0128200 | AK099898 | Similar to Transposable element Mu1 sequence.                                                                                            | others              | 1.13   | up          |
| 3.57 | Os09g0522000 | AK062422 | Similar to Dehydration-responsive element-binding protein 1B.                                                                            | transcription       | 1.01   | up          |
| 3.55 | Os06g0215600 | AK061212 | Similar to Oxo-phytodienoic acid reductase.                                                                                              | hormone             | 1.58   | down        |
| 3.52 | Os04g0340100 | AK062961 | Conserved hypothetical protein.                                                                                                          | unknown             | No Hit | No Hit      |
| 3.52 | Os01g0525800 | AK073683 | Similar to DVL5.                                                                                                                         | unknown             | No Hit | No Hit      |
| 3.47 | Os01g0689900 | AK066381 | Serine/threonine protein kinase-related domain containing protein                                                                        | phosphorylation     | 1.17   | down        |

|      |              |          |                                                                                                    |                  |       |               |
|------|--------------|----------|----------------------------------------------------------------------------------------------------|------------------|-------|---------------|
| 3.47 | Os04g0683700 | AK105693 | Similar to 4-coumarate-CoA ligase-like protein (Adenosine monophosphate binding protein 3 AMPBP3). | metabolism       | 2.60  | up            |
| 3.40 | Os07g0531200 | AK111249 | Conserved hypothetical protein.                                                                    | unknown          | 1.06  | down          |
| 3.39 | Os04g0669800 | AK067649 | Methylthioribose kinase (EC 2.7.1.100).                                                            | hormone          | 4.78  | down (p<0.01) |
| 3.38 | Os12g0278700 | AK068027 | Similar to Cystinosin homolog.                                                                     | membrane protein | 2.38  | down (p<0.01) |
| 3.36 | Os02g0774200 | AK064163 | Conserved hypothetical protein.                                                                    | unknown          | 1.75  | down          |
| 3.35 | Os08g0485000 | AK073011 | Similar to Phi-1 protein.                                                                          | unknown          | 1.43  | up            |
| 3.31 | Os01g0631200 | AK072497 | Similar to Uroporphyrinogen III methyltransferase.                                                 | metabolism       | 4.22  | down (p<0.01) |
| 3.30 | Os07g0646800 | AK071716 | Similar to Avr9/Cf-9 rapidly elicited protein 231.                                                 | metabolism       | 2.50  | down (p<0.01) |
| 3.30 | Os01g0149200 | AK069318 | Conserved hypothetical protein.                                                                    | unknown          | 1.02  | up            |
| 3.29 | Os04g0556300 | AK062772 | Glutathione peroxidase.                                                                            | detoxication     | 2.16  | down (p<0.01) |
| 3.29 | Os01g0795600 | AK111059 | Conserved hypothetical protein.                                                                    | unknown          | 4.13  | up            |
| 3.28 | Os12g0190000 | AK071188 | Similar to VTC2.                                                                                   | unknown          | 3.23  | down          |
| 3.25 | Os09g0483100 | AK107051 | EF-Hand type domain containing protein.                                                            | ion binding      | 3.11  | up            |
| 3.24 | Os03g0147400 | AK071480 | Divalent ion symporter domain containing protein.                                                  | membrane protein | 1.57  | down          |
| 3.21 | Os11g0502700 | AK065205 | Conserved hypothetical protein.                                                                    | unknown          | 1.33  | down          |
| 3.20 | Os01g0830700 | AK101671 | Protein of unknown function DUF231, plant domain containing protein.                               | unknown          | 1.03  | down          |
| 3.19 | Os01g0660400 | AK109270 | Conserved hypothetical protein.                                                                    | unknown          | 14.42 | up (p<0.01)   |
| 3.18 | Os01g0837800 | AK064840 | Similar to Cation diffusion facilitator 8.                                                         | membrane protein | 2.25  | down (p<0.01) |

|      |              |          |                                                                         |                    |        |               |
|------|--------------|----------|-------------------------------------------------------------------------|--------------------|--------|---------------|
| 3.16 | Os01g0261200 | AK102808 | No apical meristem (NAM) protein domain containing protein.             | transcription      | 1.88   | up (p<0.01)   |
| 3.15 | Os05g0584200 | AK061818 | Similar to Late embryogenesis abundant protein Lea14-A.                 | unknown            | 2.05   | up (p<0.01)   |
| 3.15 | Os06g0602500 | AK111737 | Serine/threonine protein kinase-related domain containing protein       | phosphorylation    | 1.09   | up            |
| 3.14 | Os07g0100200 | AK073305 | Similar to PDX1-like protein 4.                                         | unknown            | 1.24   | up            |
| 3.14 | Os12g0147800 | AK059860 | Similar to Phytosulfokines 5 precursor (Secretory protein SH27A).       | cell division      | 1.71   | down (p<0.01) |
| 3.13 | Os02g0703600 | AK067007 | Similar to Cytochrome P450 90C1 (EC 1.14.-.-) (ROTUNDIFOLIA3).          | hormone            | 1.44   | up (p<0.01)   |
| 3.12 | Os03g0245800 | AK063618 | Similar to Heat shock protein 26.                                       | others             | 20.31  | up (p<0.01)   |
| 3.12 | Os03g0806600 | AK070959 | Conserved hypothetical protein.                                         | unknown            | 1.43   | up            |
| 3.12 | Os06g0195800 | AK111076 | Conserved hypothetical protein.                                         | unknown            | 3.15   | up            |
| 3.11 | Os04g0605100 | AK061266 | WRKY transcription factor 68.                                           | transcription      | 1.32   | down          |
| 3.11 | Os11g0607200 | AK111536 | Protein kinase, core domain containing protein.                         | phosphorylation    | 1.63   | up            |
| 3.10 | Os07g0631700 | AK105175 | EF-Hand type domain containing protein.                                 | ion binding        | 1.20   | up            |
| 3.10 | Os05g0380900 | AK067214 | Similar to Polcalcin Jun o 2 (Calcium-binding pollen allergen Jun o 2). | ion binding        | 4.01   | up            |
| 3.10 | Os07g0603600 | AK071549 | Similar to Avr9/Cf-9 rapidly elicited protein 246 (Fragment).           | catalytic activity | 1.44   | up            |
| 3.09 | Os05g0469800 | AK100501 | Pyruvate decarboxylase (EC 4.1.1.1)                                     | metabolism         | No Hit | No Hit        |
| 3.06 | Os07g0486500 | AK063998 | RhoGAP domain containing protein.                                       | signaling          | 1.58   | up            |

|      |              |          |                                                                    |                     |       |               |
|------|--------------|----------|--------------------------------------------------------------------|---------------------|-------|---------------|
| 3.06 | Os04g0555300 | AK103226 | Major facilitator superfamily protein.                             | membrane protein    | 1.36  | down          |
| 3.06 | Os01g0916400 | AK071710 | Similar to Selenium binding protein.                               | stress              | 1.36  | down          |
| 3.05 | Os01g0689900 | AK100606 | Conserved hypothetical protein.                                    | unknown             | 1.17  | down          |
| 3.04 | Os10g0419400 | AK103834 | Similar to SIPL.                                                   | unknown             | 11.87 | down (p<0.01) |
| 3.04 | Os07g0596600 | AK067238 | Similar to Cdc2MsC protein.                                        | cell division       | 1.23  | down          |
| 3.04 | Os04g0567700 | AK064998 | ORMDL family protein.                                              | membrane protein    | 3.43  | up (p<0.01)   |
| 3.03 | Os03g0180900 | AK073589 | Tify domain containing protein.                                    | stress              | 12.41 | down (p<0.01) |
| 3.02 | Os08g0494300 | AK066150 | Copine domain containing protein.                                  | protein binding     | 4.29  | up (p<0.01)   |
| 3.01 | Os03g0326500 | AK058426 | Similar to Thioredoxin-like 1.                                     | detoxication        | 1.85  | up            |
| 3.00 | Os02g0819400 | AK100921 | Globin-like family protein.                                        | unknown             | 1.50  | up            |
| 3.00 | Os03g0790500 | AK107136 | Alpha/beta hydrolase fold-3 domain containing protein.             | metabolism          | 3.40  | down          |
| 2.98 | Os05g0580000 | AK100910 | Similar to ADP-glucose pyrophosphorylase (EC 2.7.7.27) (Fragment). | metabolism          | 1.47  | down          |
| 2.96 | Os04g0524600 | AK069437 | Oligopeptide transporter OPT superfamily protein.                  | membrane protein    | 1.00  | down          |
| 2.95 | Os03g0655400 | AK059150 | Similar to LIP5.                                                   | stress              | 1.36  | up            |
| 2.95 | Os03g0376100 | AK060421 | Similar to Cystathionine gamma-synthase (Fragment).                | metabolism          | 1.95  | up (p<0.01)   |
| 2.94 | Os02g0631200 | AK105924 | Homeodomain-like containing protein.                               | transcription       | 2.85  | up            |
| 2.91 | Os02g0317500 | AK102355 | Cyclin-like F-box domain containing protein.                       | protein degradation | 2.40  | up (p<0.01)   |
| 2.89 | Os01g0716800 | AK101741 | Endonuclease/exonuclease/phosphatase domain containing protein.    | metabolism          | 4.43  | up            |

|      |              |          |                                                                                                                                                                                                                                        |                  |      |             |
|------|--------------|----------|----------------------------------------------------------------------------------------------------------------------------------------------------------------------------------------------------------------------------------------|------------------|------|-------------|
| 2.89 | Os05g0181800 | AK066089 | Conserved hypothetical protein.                                                                                                                                                                                                        | unknown          | 3.48 | up (p<0.01) |
| 2.88 | Os06g0219900 | AK058704 | Similar to Phi-1 protein.                                                                                                                                                                                                              | unknown          | 3.85 | up (p<0.01) |
| 2.88 | Os01g0647100 | AK069624 | ADP/ATP carrier protein family protein.                                                                                                                                                                                                | ATP binding      | 3.82 | up (p<0.01) |
| 2.87 | Os03g0816700 | AK107781 | Protein of unknown function DUF567 family protein.                                                                                                                                                                                     | unknown          | 7.34 | up (p<0.01) |
| 2.86 | Os08g0120600 | AK104952 | Similar to Fructose-bisphosphate aldolase, cytoplasmic isozyme (EC 4.1.2.13).                                                                                                                                                          | metabolism       | 2.50 | up          |
| 2.86 | Os03g0244200 | AK101837 | Similar to Thaumatin-like protein.                                                                                                                                                                                                     | stress           | 2.63 | up (p<0.01) |
| 2.86 | Os01g0192000 | AK100770 | Similar to Zinc finger transcription factor.                                                                                                                                                                                           | ion binding      | 5.89 | up (p<0.01) |
| 2.86 | Os04g0635000 | AK062619 | Conserved hypothetical protein.                                                                                                                                                                                                        | unknown          | 1.53 | up          |
| 2.85 | Os01g0664100 | AK065234 | Conserved hypothetical protein.                                                                                                                                                                                                        | unknown          | 1.24 | down        |
| 2.85 | Os06g0556000 | AK102763 | Similar to Amino acid carrier (Fragment).                                                                                                                                                                                              | membrane protein | 2.85 | up (p<0.01) |
| 2.84 | Os04g0119500 | AK061898 | Similar to Membrane related protein-like.                                                                                                                                                                                              | unknown          | 1.78 | up          |
| 2.84 | Os03g0752300 | AK069303 | Similar to K <sup>+</sup> channel protein.                                                                                                                                                                                             | membrane protein | 1.53 | up          |
| 2.83 | Os09g0438100 | AK063180 | Conserved hypothetical protein.                                                                                                                                                                                                        | unknown          | 1.84 | down        |
| 2.83 | Os04g0591100 | AK069139 | Protein of unknown function DUF597 family protein.                                                                                                                                                                                     | unknown          | 1.80 | up          |
| 2.82 | Os02g0611200 | AK070259 | Similar to S-adenosylmethionine decarboxylase proenzyme (EC 4.1.1.50) (AdoMetDC) (SamDC) (Induced stolen tip protein TUB13) [Contains: S-adenosylmethionine decarboxylase alpha chain; S-adenosylmethionine decarboxylase beta chain]. | metabolism       | 1.25 | down        |



|      |              |          |                                                                                |                    |      |             |
|------|--------------|----------|--------------------------------------------------------------------------------|--------------------|------|-------------|
| 2.82 | Os03g0187600 | AK068057 | GRAM domain containing protein.                                                | membrane protein   | 2.04 | down        |
| 2.81 | Os04g0550200 | AK108473 | Pathogenesis-related transcriptional factor and ERF domain containing protein. | transcription      | 1.52 | up          |
| 2.80 | Os01g0186900 | AK105323 | Similar to transposon protein CACTA, En/Spm sub-class.                         | others             | 1.63 | up          |
| 2.80 | Os01g0187900 | AK071611 | Similar to Transcription factor MYBS2.                                         | transcription      | 1.34 | up          |
| 2.80 | Os09g0251800 | AK061218 | C2 calcium/lipid-binding region, CaLB domain containing protein.               | ion binding        | 1.47 | up          |
| 2.79 | Os10g0431900 | AK106265 | Serine/threonine protein kinase-related domain containing protein.             | phosphorylation    | 4.77 | up          |
| 2.78 | Os05g0110900 | AK073169 | Similar to Protein kinase APK1B, chloroplast precursor (EC 2.7.1.-).           | signaling          | 1.11 | up          |
| 2.77 | Os01g0911700 | AK073805 | Similar to Regulatory protein viviparous-1.                                    | transcription      | 5.10 | up (p<0.01) |
| 2.77 | Os04g0461600 | AK072586 | Similar to Fw2.2.                                                              | unknown            | 1.03 | down        |
| 2.77 | Os12g0578400 | AK060767 | Glycoside hydrolase family 79, N-terminal protein.                             | metabolism         | 1.13 | down        |
| 2.77 | Os02g0118200 | AK111716 | Similar to Protein kinase APK1B, chloroplast precursor (EC 2.7.1.-).           | signaling          | 1.14 | up          |
| 2.75 | Os04g0306400 | AK103443 | Ribose 5-phosphate isomerase family protein.                                   | metabolism         | 1.05 | up          |
| 2.74 | Os09g0517600 | AK101828 | Similar to FH protein NFH1.                                                    | actin binding      | 2.29 | up (p<0.01) |
| 2.73 | Os11g0536800 | AK102704 | Amidase family protein.                                                        | catalytic activity | 1.02 | down        |
| 2.73 | Os04g0653600 | AK059064 | Similar to AINTEGUMENTA-like protein.                                          | transcription      | 2.92 | up (p<0.01) |
| 2.72 | Os07g0607800 | AK106786 | Conserved hypothetical protein.                                                | unknown            | 1.05 | down        |

|      |              |          |                                                                           |                    |        |               |
|------|--------------|----------|---------------------------------------------------------------------------|--------------------|--------|---------------|
| 2.72 | Os04g0224900 | AK058569 | FAD dependent oxidoreductase family protein.                              | metabolism         | 3.56   | down (p<0.01) |
| 2.71 | Os10g0407000 | AK101494 | Pectin lyase fold/virulence factor domain containing protein.             | cell elongation    | 1.62   | up (p<0.01)   |
| 2.71 | Os10g0113100 | AK103772 | Aldo/keto reductase family protein.                                       | metabolism         | 2.08   | up (p<0.01)   |
| 2.70 | Os10g0162000 | AK062627 | Conserved hypothetical protein.                                           | unknown            | 1.67   | up            |
| 2.70 | Os10g0525500 | AK063104 | Similar to Glutathione S-transferase GSTU31 (Fragment).                   | stress             | 1.55   | up            |
| 2.70 | Os01g0110400 | AK103194 | Similar to Acetyl-CoA C-acetyltransferase.                                | metabolism         | 1.04   | down          |
| 2.69 | Os06g0192800 | AK070038 | Similar to RING-H2 finger protein ATL1R (RING-H2 finger protein ATL8).    | protein binding    | 2.18   | up            |
| 2.69 | Os02g0726300 | AK101321 | Similar to AOBP (Ascorbate oxidase promoter-binding protein).             | transcription      | 1.43   | up            |
| 2.68 | Os07g0438600 | AK102261 | Proteinase inhibitor I9, subtilisin propeptide domain containing protein. | catalytic activity | 98.69  | up (p<0.01)   |
| 2.67 | Os10g0482900 | AK071332 | Thioredoxin fold domain containing protein.                               | detoxication       | 3.11   | up            |
| 2.67 | Os01g0575200 | AK106333 | Conserved hypothetical protein.                                           | unknown            | 1.62   | down          |
| 2.66 | Os04g0493000 | AK061664 | Similar to H0425E08.14 protein.                                           | unknown            | 1.19   | up            |
| 2.66 | Os03g0285800 | AK067339 | MAP Kinase. OsMAPK2                                                       | cell division      | 1.06   | down          |
| 2.65 | Os03g0440900 | AK061730 | Similar to LRR protein.                                                   | nucleotide binding | 1.60   | up            |
| 2.64 | Os03g0676400 | AK109228 | VQ domain containing protein.                                             | unknown            | 7.39   | up (p<0.01)   |
| 2.63 | Os10g0529400 | AK102196 | Similar to Tau class GST protein 4.                                       | stress             | No Hit | No Hit        |
| 2.63 | Os08g0464400 | AK073370 | Zinc finger, RING-type domain containing protein.                         | protein binding    | 1.01   | down          |

|      |              |          |                                                                                                                          |                    |      |               |
|------|--------------|----------|--------------------------------------------------------------------------------------------------------------------------|--------------------|------|---------------|
| 2.63 | Os04g0684800 | AK066799 | Similar to CROC-1-like protein (Fragment).                                                                               | catalytic activity | 3.48 | up            |
| 2.62 | Os01g0719100 | AK068005 | Similar to PGPD14 protein.                                                                                               | protein binding    | 1.63 | up            |
| 2.62 | Os01g0797600 | AK069262 | Ethylene responsive element binding factor3 (OsERF3).                                                                    | transcription      | 1.81 | up            |
| 2.61 | Os01g0165000 | AK067313 | DRE binding protein 2.                                                                                                   | transcription      | 1.24 | up            |
| 2.61 | Os09g0440300 | AK060757 | Similar to Aldehyde dehydrogenase family 7 member A1 (EC 1.2.1.3) (Antiquitin 1) (Matured fruit 60 kDa protein) (MF-60). | metabolism         | 1.99 | down (p<0.01) |
| 2.58 | Os01g0246700 | AK105509 | Similar to WRKY transcription factor 1.                                                                                  | transcription      | 2.11 | up            |
| 2.57 | Os11g0158300 | AK070475 | Pentatricopeptide repeat containing protein.                                                                             | nucleotide binding | 1.12 | up            |
| 2.57 | Os02g0214900 | AK071228 | Similar to Histone deacetylase HDAC2.                                                                                    | transcription      | 1.08 | up            |
| 2.57 | Os07g0585500 | AK070285 | Conserved hypothetical protein.                                                                                          | unknown            | 1.63 | down          |
| 2.57 | Os06g0193400 | AK065667 | Similar to Helix-loop-helix protein homolog.                                                                             | transcription      | 1.06 | up            |
| 2.57 | Os04g0119500 | AK065035 | Similar to Membrane related protein-like.                                                                                | unknown            | 1.78 | up            |
| 2.56 | Os01g0845000 | AK106438 | Conserved hypothetical protein.                                                                                          | unknown            | 1.41 | up            |
| 2.56 | Os03g0128800 | AK066570 | Conserved hypothetical protein.                                                                                          | unknown            | 3.75 | up            |
| 2.56 | Os10g0463800 | AK102352 | Conserved hypothetical protein.                                                                                          | unknown            | 1.17 | down          |
| 2.55 | Os07g0557100 | AK102045 | Delayed-early response protein/equilibrative nucleoside transporter family protein.                                      | membrane protein   | 1.93 | up            |
| 2.54 | Os10g0525000 | AK099925 | Cytochrome P450 family protein.                                                                                          | metabolism         | 1.67 | down          |
| 2.54 | Os05g0119300 | AK068289 | XYPPX repeat containing protein.                                                                                         | unknown            | 2.81 | down (p<0.01) |
| 2.53 | Os07g0225300 | AK073667 | OsNAC3 protein.                                                                                                          | transcription      | 1.53 | up            |
| 2.50 | Os05g0495300 | AK067980 | Conserved hypothetical protein.                                                                                          | unknown            | 1.71 | up            |

|      |              |          |                                                 |                 |       |             |
|------|--------------|----------|-------------------------------------------------|-----------------|-------|-------------|
| 2.50 | Os02g0210700 | AK111879 | Protein kinase, core domain containing protein. | phosphorylation | 20.07 | up (p<0.01) |
|------|--------------|----------|-------------------------------------------------|-----------------|-------|-------------|

---

<sup>a</sup> Fold change shows the average expression ratio of three biological replicates and a colour swap for each replicate.

<sup>b</sup> Locus ID

<sup>c</sup> Full-length cDNA accession number

<sup>d</sup> Description in Rice Annotation Project Database (RAP-DB; <http://rapdb.dna.affrc.go.jp/>)

<sup>e</sup> Data was extracted from Narsai et al. (2009), *Plant Physiology* **151**: 306–322.
