# Supplementary material
Source: PubMed Central journal article supplement (PMC3143047)
Supplement: supp_mcr137_mcr134supp_table2.pdf [file supp_mcr137_mcr134supp_table2.pdf]

## SUPPLEMENTARY DATA

TABLE S2. Down-regulated genes in the *rad* mutant

| Fold change<br>( <i>rad</i> /WT) <sup>a</sup> | Locus ID <sup>b</sup> | Full-length cDNA<br>accession no. <sup>c</sup> | Description <sup>d</sup>                                                           | Predicted functional<br>classification | Data in Narsai <i>et al.</i> (2009) <sup>e</sup> |                                            |
|-----------------------------------------------|-----------------------|------------------------------------------------|------------------------------------------------------------------------------------|----------------------------------------|--------------------------------------------------|--------------------------------------------|
|                                               |                       |                                                |                                                                                    |                                        | Fold change                                      | Direction of<br>regulation (24A vs<br>24N) |
| 0.09                                          | Os03g0836800          | AK061197                                       | Similar to IAA-amino acid hydrolase 1 (EC 3.5.1.-).                                | hormone                                | 243.5                                            | down (p<0.01)                              |
| 0.11                                          | Os02g0178100          | AK109630                                       | CCT domain containing protein.                                                     | transcription                          | 1.0                                              | down                                       |
| 0.11                                          | Os12g0111400          | AK062951                                       | Conserved hypothetical protein.                                                    | unknown                                | No Hit                                           | No Hit                                     |
| 0.12                                          | Os03g0738600          | AK073529                                       | Similar to Lipoxygenase L-2 (EC 1.13.11.12).                                       | hormone                                | 786.6                                            | down (p<0.01)                              |
| 0.13                                          | Os05g0507000          | AK108025                                       | Conserved hypothetical protein.                                                    | unknown                                | 56.5                                             | down                                       |
| 0.14                                          | Os11g0439600          | AK069955                                       | Similar to Nod factor binding lectin-nucleotide phosphohydrolase.                  | unknown                                | No Hit                                           | No Hit                                     |
| 0.14                                          | Os04g0496300          | AK062810                                       | Conserved hypothetical protein.                                                    | unknown                                | 73.2                                             | down (p<0.01)                              |
| 0.14                                          | Os06g0199000          | AK106381                                       | Similar to Glycine-rich cell wall structural protein 2 precursor.                  | cell elongation                        | 51.7                                             | up (p<0.01)                                |
| 0.16                                          | Os04g0413500          | AK072276                                       | Similar to Cell wall invertase 2. (OsCIN2.)                                        | metabolism                             | 3.5                                              | down                                       |
| 0.16                                          | Os09g0556800          | AK101051                                       | Conserved hypothetical protein.                                                    | unknown                                | 41.5                                             | down (p<0.01)                              |
| 0.16                                          | Os08g0389700          | AK065108                                       | Conserved hypothetical protein.                                                    | unknown                                | 149.4                                            | down (p<0.01)                              |
| 0.16                                          | Os11g0306400          | AK106179                                       | Similar to Herbicide safener binding protein.                                      | unknown                                | 13.3                                             | down (p<0.01)                              |
| 0.17                                          | Os01g0348800          | AK062553                                       | Similar to Salt-stress induced protein (Salt protein).                             | stress                                 | 3.8                                              | down (p<0.01)                              |
| 0.17                                          | Os05g0205100          | AK111332                                       | NLI interacting factor domain containing protein.                                  | unknown                                | No Hit                                           | No Hit                                     |
| 0.18                                          | Os01g0191800          | AK102360                                       | Similar to Serine/threonine-protein kinase 12 (EC 2.7.1.37) (Aurora-B) (Fragment). | cell division                          | 47.7                                             | down (p<0.01)                              |
| 0.18                                          | Os03g0431100          | AK058643                                       | XYPPX repeat containing protein.                                                   | unknown                                | 24.4                                             | down (p<0.01)                              |

|      |              |          |                                                                               |                    |       |               |
|------|--------------|----------|-------------------------------------------------------------------------------|--------------------|-------|---------------|
| 0.19 | Os10g0471100 | AK100751 | Wax-deficient anther1. Similar to CER1.                                       | metabolism         | 7.3   | down (p<0.01) |
| 0.19 | Os02g0699500 | AK062786 | Conserved hypothetical protein.                                               | unknown            | 17.4  | down (p<0.01) |
| 0.20 | Os01g0813800 | AK067934 | Glycoside hydrolase, family 1 protein.                                        | metabolism         | 1.3   | down          |
| 0.20 | Os04g0563700 | AK070211 | CycB2;1.                                                                      | cell division      | 32.7  | down (p<0.01) |
| 0.20 | Os01g0176500 | AK102552 | Conserved hypothetical protein.                                               | unknown            | 38.2  | down (p<0.01) |
| 0.20 | Os03g0432100 | AK065739 | Similar to Orthophosphate dikinase precursor (EC 2.7.9.1).                    | photosynthesis     | 104.5 | up (p<0.01)   |
| 0.21 | Os12g0189300 | AK068710 | Pyruvate/Phosphoenolpyruvate kinase, catalytic core domain containing protein | metabolism         | 36.4  | down (p<0.01) |
| 0.21 | Os09g0491100 | AK066710 | Similar to Beta-primeverosidase (EC 3.2.1.149).                               | metabolism         | 120.0 | down (p<0.01) |
| 0.21 | Os02g0700100 | AK102954 | Similar to WD-repeat protein.                                                 | signaling          | 14.8  | down (p<0.01) |
| 0.21 | Os10g0577400 | AK064295 | Conserved hypothetical protein.                                               | unknown            | 55.9  | down (p<0.01) |
| 0.22 | Os06g0726800 | AK070518 | CycB2;2.                                                                      | cell division      | 30.9  | down (p<0.01) |
| 0.22 | Os01g0756900 | AK058427 | Conserved hypothetical protein.                                               | unknown            | 15.5  | down (p<0.01) |
| 0.23 | Os02g0742800 | AK106279 | Conserved hypothetical protein.                                               | unknown            | 49.2  | down (p<0.01) |
| 0.23 | Os11g0171700 | AK099115 | Forkhead-associated domain containing protein.                                | protein binding    | 8.9   | down (p<0.01) |
| 0.24 | Os06g0142200 | AK105832 | Early nodulin.                                                                | metabolism         | 1.3   | up            |
| 0.24 | Os12g0245700 | AK107691 | Conserved hypothetical protein.                                               | unknown            | 5.8   | down          |
| 0.24 | Os02g0158100 | AK058991 | EF hand domain containing protein 1.                                          | endocytosis        | 42.0  | down (p<0.01) |
| 0.24 | Os04g0375900 | AK101769 | Kinesin, motor region domain containing protein.                              | cell division      | 28.8  | down (p<0.01) |
| 0.24 | Os10g0498900 | AK108732 | Similar to Microtubule-associated protein EB1-like protein.                   | cell elongation    | 38.5  | down (p<0.01) |
| 0.25 | Os01g0946100 | AK072248 | WD40-like domain containing protein.                                          | nucleotide binding | 10.6  | down (p<0.01) |
| 0.25 | Os04g0559700 | AK058323 | Similar to Plasma membrane intrinsic protein.                                 | membrane protein   | 1.2   | down          |
| 0.25 | Os09g0547200 | AK073078 | Protein of unknown function DUF292, eukaryotic                                | unknown            | 35.4  | down (p<0.01) |

|      |              |          |                                                                                                                                   |                    |      |               |
|------|--------------|----------|-----------------------------------------------------------------------------------------------------------------------------------|--------------------|------|---------------|
|      |              |          | domain containing protein.                                                                                                        |                    |      |               |
| 0.25 | Os02g0699700 | AK072471 | Similar to DNA topoisomerase II.                                                                                                  | cell division      | 14.9 | down (p<0.01) |
| 0.26 | Os07g0474300 | AK108961 | Conserved hypothetical protein.                                                                                                   | unknown            | 11.7 | down (p<0.01) |
| 0.26 | Os03g0128300 | AK064718 | Conserved hypothetical protein.                                                                                                   | unknown            | 48.0 | down (p<0.01) |
| 0.26 | Os08g0421800 | AK103087 | Similar to Mitogen-activated protein kinase kinase 1 (EC 2.7.1.-) (Arabidopsis NPK1-related protein kinase 1). Splice isoform 1S. | cell division      | 29.1 | down (p<0.01) |
| 0.26 | Os03g0114000 | AK063381 | Similar to Kinesin.                                                                                                               | cell division      | 22.4 | down (p<0.01) |
| 0.26 | Os03g0288900 | AK100329 | Conserved hypothetical protein.                                                                                                   | unknown            | 1.5  | up            |
| 0.26 | Os09g0484200 | AK073885 | Conserved hypothetical protein.                                                                                                   | unknown            | 1.1  | up            |
| 0.27 | Os03g0297800 | AK107121 | Protein kinase-like domain containing protein.                                                                                    | phosphorylation    | 21.5 | down (p<0.01) |
| 0.27 | Os04g0229100 | AK071484 | Similar to Sinapyl alcohol dehydrogenase.                                                                                         | metabolism         | 1.2  | down          |
| 0.27 | Os01g0972900 | AK109536 | Similar to Clone ZZD405 mRNA sequence. (Fragment).                                                                                | unknown            | 14.9 | down (p<0.01) |
| 0.27 | Os03g0765900 | AK058858 | PetM of cytochrome b6f complex subunit 7 family protein.                                                                          | photosynthesis     | 2.2  | down          |
| 0.27 | Os03g0712100 | AK106258 | Cell division cycle-associated protein domain containing protein.                                                                 | cell division      | 13.9 | down (p<0.01) |
| 0.28 | Os03g0120000 | AK101925 | Conserved hypothetical protein.                                                                                                   | unknown            | 7.0  | down (p<0.01) |
| 0.28 | Os03g0780200 | AK107920 | Conserved hypothetical protein.                                                                                                   | unknown            | 46.9 | down (p<0.01) |
| 0.28 | Os03g0659800 | AK062366 | Conserved hypothetical protein.                                                                                                   | unknown            | 25.8 | down (p<0.01) |
| 0.28 | Os12g0263100 | AK102127 | Similar to Zinc finger, DHHC domain containing 4.                                                                                 | nucleotide binding | 24.4 | down (p<0.01) |
| 0.29 | Os05g0406800 | AK062566 | Leucine rich repeat, N-terminal domain containing protein.                                                                        | nucleotide binding | 7.7  | down (p<0.01) |
| 0.29 | Os03g0183500 | AK063042 | Protein of unknown function DUF581 family                                                                                         | unknown            | 5.6  | down (p<0.01) |

|      |              |          |                                                                                                               |               |        |               |
|------|--------------|----------|---------------------------------------------------------------------------------------------------------------|---------------|--------|---------------|
|      |              |          | protein.                                                                                                      |               |        |               |
| 0.29 | Os01g0685900 | AK064024 | Similar to 65kD microtubule associated protein.                                                               | cell division | 47.0   | down (p<0.01) |
| 0.29 | Os02g0739700 | AK111537 | E2F Family domain containing protein.                                                                         | cell division | 34.1   | down (p<0.01) |
| 0.30 | Os03g0165400 | AK102192 | Similar to Relative to SR12 protein (Fragment).                                                               | metabolism    | 1.9    | down (p<0.01) |
| 0.30 | Os12g0120000 | AK105399 | Protein of unknown function DUF936, plant family protein.                                                     | unknown       | No Hit | No Hit        |
| 0.30 | Os06g0711900 | AK105838 | Bifunctional inhibitor/plant lipid transfer protein/seed storage domain containing protein. (Os06t0711900-01) | unknown       | 3.6    | down          |
| 0.30 | Os02g0718100 | AK109216 | Conserved hypothetical protein.                                                                               | unknown       | 6.2    | down (p<0.01) |
| 0.31 | Os04g0228100 | AK059410 | Conserved hypothetical protein.                                                                               | unknown       | 28.4   | down (p<0.01) |
| 0.31 | Os09g0507500 | AK071392 | Similar to Peroxidase 55 precursor (EC 1.11.1.7) (Atperox P55) (ATP20a).                                      | stress        | 1.2    | down          |
| 0.31 | Os01g0108800 | AK102103 | Protein of unknown function DUF936, plant family protein.                                                     | unknown       | 13.7   | down (p<0.01) |
| 0.31 | Os11g0120200 | AK101734 | Protein of unknown function DUF936, plant family protein.                                                     | unknown       | No Hit | No Hit        |
| 0.31 | Os03g0162200 | AK061605 | Similar to Histone H2A.                                                                                       | cell division | 37.4   | down (p<0.01) |
| 0.32 | Os03g0238600 | AK070684 | Similar to Purple acid phosphatase.                                                                           | unknown       | 1.0    | up            |
| 0.32 | Os07g0264100 | AK065209 | NAD(P)-binding domain containing protein                                                                      | metabolism    | 13.4   | down (p<0.01) |
| 0.32 | Os11g0150400 | AK058243 | Stress responsive alpha-beta barrel domain containing protein. Similar to pop3 peptide.                       | metabolism    | 1.7    | down          |
| 0.32 | Os02g0302700 | AK060537 | Similar to Nicotianamine aminotransferase A.                                                                  | metabolism    | 27.4   | down (p<0.01) |
| 0.32 | Os07g0659500 | AK073537 | Non-SMC condensin subunit, XCAP-D2/Cnd1 family protein.                                                       | cell division | 16.1   | down (p<0.01) |

|      |              |          |                                                                                     |                    |        |               |
|------|--------------|----------|-------------------------------------------------------------------------------------|--------------------|--------|---------------|
| 0.32 | Os10g0544600 | AK105882 | Zinc finger, RING/FYVE/PHD-type domain containing protein.                          | protein binding    | 1.2    | down          |
| 0.32 | Os05g0497100 | AK064293 | Similar to SMC4 protein.                                                            | cell division      | 10.5   | down (p<0.01) |
| 0.32 | Os01g0909400 | AK068178 | Protein of unknown function DUF868, plant family protein.                           | unknown            | 1.4    | down          |
| 0.32 | Os02g0658800 | AK059638 | Beta-expansin (OsEXPB11).                                                           | cell elongation    | 6.8    | down (p<0.01) |
| 0.32 | Os01g0863500 | AK111023 | Conserved hypothetical protein.                                                     | unknown            | 3.4    | down          |
| 0.33 | Os11g0107700 | AK073061 | Similar to Leucine Rich Repeat family protein, expressed.                           | nucleotide binding | 7.7    | down (p<0.01) |
| 0.33 | Os06g0179000 | AK065263 | Glycoside hydrolase family 79, N-terminal protein.                                  | metabolism         | 2.0    | up (p<0.01)   |
| 0.33 | Os05g0226900 | AK100217 | Similar to Repetitive proline rich protein.                                         | unknown            | No Hit | No Hit        |
| 0.33 | Os01g0151700 | AK099949 | Similar to Short-chain dehydrogenase Tic32.                                         | metabolism         | 17.9   | down (p<0.01) |
| 0.33 | Os08g0199400 | AK105852 | Similar to Stearoyl-acyl carrier protein desaturase (EC 1.14.99.6) (Fragment).      | metabolism         | 18.8   | down (p<0.01) |
| 0.33 | Os08g0512600 | AK059682 | Protein cdc2 kinase (cdc2Os3).                                                      | cell division      | 21.3   | down (p<0.01) |
| 0.33 | Os02g0193600 | AK060499 | Mitotic checkpoint serine/threonine protein kinase, Bub1 domain containing protein. | cell division      | 25.5   | down (p<0.01) |
| 0.33 | Os08g0492000 | AK100814 | Similar to Glutathione transporter.                                                 | membrane protein   | 2.1    | down          |
| 0.34 | Os07g0448800 | AK060712 | Aquaporin.                                                                          | membrane protein   | 1.1    | down          |
| 0.34 | Os01g0259400 | AK102537 | Armadillo-type fold domain containing protein.                                      | unknown            | 12.6   | down (p<0.01) |
| 0.34 | Os04g0644400 | AK071989 | Similar to Proline-rich-like protein.                                               | unknown            | No Hit | No Hit        |
| 0.34 | Os04g0228400 | AK069548 | Expansin precursor (Alpha-expansin OsEXPA1).                                        | cell elongation    | 1.4    | down          |
| 0.34 | Os07g0507200 | AK102722 | Targeting for Xklp2 family protein.                                                 | cell division      | 35.4   | down (p<0.01) |
| 0.34 | Os02g0258200 | AK070270 | High mobility group box domain containing protein.                                  | nucleotide binding | 27.5   | down (p<0.01) |

|      |              |          |                                                                                                                                                                                            |                     |        |               |
|------|--------------|----------|--------------------------------------------------------------------------------------------------------------------------------------------------------------------------------------------|---------------------|--------|---------------|
|      |              |          | Similar to Glucose-1-phosphate adenylyltransferase small subunit, chloroplast precursor (EC 2.7.7.27)                                                                                      |                     |        |               |
| 0.34 | Os08g0345800 | AK058551 | (ADP-glucose synthase) (ADP-glucose pyrophosphorylase) (AGPASE B) (Alpha-D-glucose-1-phosphate adenyl transferase).                                                                        | metabolism          | 1.0    | down          |
| 0.35 | Os05g0585400 | AK067538 | Conserved hypothetical protein.                                                                                                                                                            | unknown             | 1.5    | down          |
| 0.35 | Os04g0530100 | AK107184 | Similar to Beta-expansin 1 precursor (AtEXPB1) (At-EXPB1) (Ath-ExpBeta-1.5) (OsEXPB17).                                                                                                    | cell elongation     | 16.2   | down          |
| 0.35 | Os04g0105200 | AK058807 | Conserved hypothetical protein.                                                                                                                                                            | unknown             | 1.0    | down          |
| 0.35 | Os01g0963800 | AK107518 | Conserved hypothetical protein.                                                                                                                                                            | unknown             | 1.2    | up            |
| 0.35 | Os03g0119900 | AK058741 | Similar to histone H4.                                                                                                                                                                     | cell division       | No Hit | No Hit        |
| 0.35 | Os02g0699700 | AK063335 | Similar to DNA topoisomerase II.                                                                                                                                                           | cell division       | 14.9   | down (p<0.01) |
| 0.35 | Os05g0415700 | AK102449 | Glycoside hydrolase, family 20 protein.                                                                                                                                                    | metabolism          | 1.1    | up            |
| 0.35 | Os02g0511600 | AK111241 | Glycosyl transferase, family 31 protein.                                                                                                                                                   | metabolism          | 1.6    | up (p<0.01)   |
| 0.35 | Os03g0770900 | AK106660 | Conserved hypothetical protein.                                                                                                                                                            | unknown             | 28.2   | down (p<0.01) |
| 0.35 | Os02g0218800 | AK105964 | Similar to Allene oxide synthase (EC 4.2.1.92).                                                                                                                                            | hormone             | 57.7   | down (p<0.01) |
| 0.35 | Os02g0794500 | AK111818 | Similar to Serine carboxypeptidase II precursor (EC 3.4.16.6) (Carboxypeptidase D) (Bri1 suppressor 1) [Contains: Serine carboxypeptidase II chain A; Serine carboxypeptidase II chain B]. | protein degradation | 1.4    | down          |
| 0.36 | Os02g0687900 | AK064814 | Peptidase S10, serine carboxypeptidase family protein.                                                                                                                                     | protein degradation | 1.8    | down          |
| 0.36 | Os09g0538500 | AK105425 | Similar to Male sterility MS5.                                                                                                                                                             | unknown             | 21.5   | down (p<0.01) |
| 0.36 | Os02g0606700 | AK063512 | Conserved hypothetical protein.                                                                                                                                                            | unknown             | 28.0   | down (p<0.01) |
| 0.36 | Os11g0549615 | AK069660 | Metallophosphoesterase domain containing protein.                                                                                                                                          | unknown             | 3.4    | down (p<0.01) |

|      |              |          |                                                                                                                                                       |                     |        |               |
|------|--------------|----------|-------------------------------------------------------------------------------------------------------------------------------------------------------|---------------------|--------|---------------|
| 0.36 | Os12g0433500 | AK102130 | Similar to Fused1 (Fragment).                                                                                                                         | unknown             | 19.5   | down (p<0.01) |
| 0.37 | Os04g0583600 | AK059019 | Similar to histone H4.                                                                                                                                | cell division       | No Hit | No Hit        |
| 0.37 | Os03g0294600 | AK110762 | Similar to Importin-beta1.                                                                                                                            | membrane protein    | 15.9   | down (p<0.01) |
| 0.37 | Os07g0638000 | AK060298 | Conserved hypothetical protein.                                                                                                                       | unknown             | 16.6   | down (p<0.01) |
| 0.37 | Os05g0459400 | AK073413 | Kinesin, motor region domain containing protein.                                                                                                      | cell division       | 29.4   | down (p<0.01) |
| 0.37 | Os01g0662700 | AK068152 | Similar to Naphthoate synthase (EC 4.1.3.36).                                                                                                         | metabolism          | 1.5    | down          |
| 0.37 | Os04g0505200 | AK066703 | Leucine-rich repeat, plant specific containing protein.                                                                                               | nucleotide binding  | 1.3    | down          |
| 0.38 | Os02g0178700 | AK110943 | Helix-loop-helix DNA-binding domain containing protein.                                                                                               | transcription       | 1.4    | down          |
| 0.38 | Os01g0814100 | AK061173 | Similar to Bindin (Fragment).                                                                                                                         | unknown             | 1.9    | down          |
| 0.38 | Os05g0512000 | AK102433 | Zinc finger, RING/FYVE/PHD-type domain containing protein.                                                                                            | protein binding     | 9.2    | down (p<0.01) |
| 0.38 | Os05g0113900 | AK074018 | Similar to Histone H2A.                                                                                                                               | cell division       | 31.7   | down (p<0.01) |
| 0.38 | Os06g0285400 | AK067208 | Similar to Serine/threonine-specific kinase like protein.                                                                                             | phosphorylation     | 39.0   | down (p<0.01) |
| 0.38 | Os06g0514100 | AK062831 | Similar to Thionin Osth1.                                                                                                                             | unknown             | No Hit | No Hit        |
| 0.38 | Os03g0314500 | AK065474 | Six-bladed beta-propeller, TolB-like domain containing protein.                                                                                       | metabolism          | 40.0   | down (p<0.01) |
| 0.38 | Os10g0104900 | AK112062 | Similar to DNA (cytosine-5)-methyltransferase 1 (EC 2.1.1.37) (Dnmt1) (DNA methyltransferase I) (DNA MTase RnoIP) (MCMT) (M.RnoIP). Splice isoform 3. | transcription       | 48.0   | down (p<0.01) |
| 0.38 | Os03g0767600 | AK111226 | BTB domain containing protein.                                                                                                                        | protein binding     | No Hit | No Hit        |
| 0.39 | Os05g0590000 | AK070159 | Peptidase A1, pepsin family protein.                                                                                                                  | protein degradation | 1.0    | down          |

|      |              |          |                                                           |                  |      |               |
|------|--------------|----------|-----------------------------------------------------------|------------------|------|---------------|
| 0.39 | Os02g0726700 | AK068228 | Helix-loop-helix DNA-binding domain containing protein.   | transcription    | 1.0  | up            |
| 0.39 | Os05g0273800 | AK060563 | Similar to Soluble epoxide hydrolase.                     | metabolism       | 5.7  | down (p<0.01) |
| 0.39 | Os12g0233100 | AK108229 | WW/Rsp5/WWP domain containing protein.                    | protein binding  | 2.3  | down          |
| 0.39 | Os04g0511700 | AK102761 | Conserved hypothetical protein.                           | unknown          | 15.0 | down (p<0.01) |
| 0.39 | Os07g0551700 | AK067424 | Similar to Cellulose synthase (Fragment).                 | cell elongation  | 1.0  | down          |
| 0.39 | Os01g0748000 | AK103720 | Similar to Dynamin family protein.                        | cell division    | 14.5 | down (p<0.01) |
| 0.39 | Os01g0243100 | AK064212 | Similar to Kinesin.                                       | cell division    | 12.6 | down (p<0.01) |
| 0.39 | Os04g0602500 | AK058634 | Similar to Pectin acetylerase.                            | cell elongation  | 22.8 | up (p<0.01)   |
| 0.39 | Os03g0339700 | AK073084 | Protein of unknown function DUF827, plant family protein. | unknown          | 3.9  | down          |
| 0.40 | Os10g0457400 | AK063553 | Conserved hypothetical protein.                           | unknown          | 12.9 | down (p<0.01) |
| 0.40 | Os07g0448800 | AK103938 | Aquaporin.                                                | membrane protein | 1.1  | down          |
| 0.40 | Os03g0214100 | AK060582 | Replication protein A1.                                   | cell division    | 12.1 | down (p<0.01) |
| 0.40 | Os01g0571100 | AK068093 | Similar to ZmGR2a protein.                                | hormone          | 2.9  | down          |

<sup>a</sup> Fold change shows average expression ratio of three biological replicates and a colour swap for each replicate.

<sup>b</sup> Locus ID

<sup>c</sup> Full-length cDNA accession number

<sup>d</sup> Description in Rice Annotation Project Database (RAP-DB; <http://rapdb.dna.affrc.go.jp/>)

<sup>e</sup> Data was extracted from Narsai *et al.* (2009), *Plant Physiology* **151**: 306–322.
