# Supplementary material
Source: PubMed Central journal article supplement (PMC3143047)
Supplement: supp_mcr137_mcr134supp_table3.pdf [file supp_mcr137_mcr134supp_table3.pdf]

## SUPPLEMENTARY DATA

TABLE S3. Sequences of primers used in the study

| Primer                                                      | Sequence (5'→3')        |
|-------------------------------------------------------------|-------------------------|
| 1. 17S rRNA-fwd                                             | TCCTACCGATTGAATGGTCC    |
| 2. 17s rRNA-rev                                             | CTTGTTACGACTTCTCCTTCCTC |
| 3. Os11g0210300 (OsADH1)-fwd                                | CGCATGGAGAACTGAGGTTT    |
| 4. Os11g0210300 (OsADH1)-rev                                | CCAGAAATTTGCCCAGGATA    |
| 5. Os04g0563700 (cycB2;1)-fwd                               | TGCACCGGAAATACAGTACG    |
| 6. Os04g0563700 (cycB2;1)-rev                               | AAGGCTGCTTCTGAAGGTTG    |
| 7. Os06g0726800 (cycB2;2)-fwd                               | TCGTTCGAGACATTGATCTGC   |
| 8. Os06g0726800 (cycB2;2)-rev                               | AATTGCATGTGCCACAGAAC    |
| 9. Os08g0512600 (cdc2Os3)-fwd                               | TGATGTTACCACCAAGGAA     |
| 10. Os08g0512600 (cdc2Os3)-rev                              | AGCACACTAAGCAGCATCCA    |
| 11. Os01g0191800 (Aurora-B)-fwd                             | TGCGCCTGTGTAGTTACGTG    |
| 12. Os01g0191800 (Aurora-B)-rev                             | GGCGTTGCACAGAAAACATA    |
| 13. Os05g0113900 (Histone H2A)-fwd                          | GGCATTTAACTGGATGTTTTTCG |
| 14. Os05g0113900 (Histone H2A)-rev                          | AAGCACATGGGATCCAGAAG    |
| 15. Os02g0739700 (E2F family domain containing protein)-fwd | GAAGCCTGGAATCGTGTA      |
| 16. Os02g0739700 (E2F family domain containing protein)-rev | CAAGCACGCGGTAAGAAATA    |
| 17. Os04g0228400 (OsEXPA1)-fwd                              | CGTCGGCGTGTAAGACTAA     |
| 18. Os04g0228400 (OsEXPA1)-rev                              | ACAGTAAAGCATGCCGATCA    |
| 19. Os02g0658800 (OsEXPB11)-fwd                             | TCTCTCCACATCTCCTGCAA    |
| 20. Os02g0658800 (OsEXPB11)-rev                             | ACAAATCGACGACGACACAG    |
| 21. Os04g0530100 (OsEXPB17)-fwd                             | GCTGAAGCTGGGGAGAAGTA    |
| 22. Os04g0530100 (OsEXPB17)-rev                             | TTCTCAGCCGGATCAAGAAC    |
